# Supplementary material for: MDL-1, a growth- and tumor-suppressor, slows aging and prevents germline hyperplasia and hypertrophy in C. elegans
Source: publisher site journal article supplement (doi:10.18632/aging.100638), 2014-02-16
Supplement: Supplementary file [file aging-v6i2-100638-supplementary-material-SD1.pdf]

mediate the effects of insulin/IGF-1 signaling on aging in *C. elegans*. PLoS Genet. 2013; In press.

75. Ziehm M and Thornton JM. Unlocking the potential of survival data for model organisms through a new database and online analysis platform: SurvCurv. Aging Cell. 2013; 12:910-916.

76. Edgar RC. MUSCLE: a multiple sequence alignment method with reduced time and space complexity. BMC Bioinformatics. 2004; 5:113.

## SUPPLEMENTAL TABLES

**Table S1. Effect of *mdl-1* on life span in *C. elegans*.** The trials were performed at 25°C without FUdR. Genotype: N2 wildtype, GA1200 *mdl-1(tm311)*, DR1567 *daf-2 (m577)*, GA1204 *daf-2(m577); mdl-1(tm311)*. *p*, log rank test. [n] biological replicates number. [C], combined data from 4 trials.

| Genotype                             | Deaths/<br>censored | Mean life<br>span (days) | % vs. wild<br>type | <i>p</i> vs. wild<br>type | % vs.<br><i>daf-2</i> | <i>p</i> vs.<br><i>daf-2</i> |
|--------------------------------------|---------------------|--------------------------|--------------------|---------------------------|-----------------------|------------------------------|
| Wild type                            | [C] 513/18          | 14.7                     |                    |                           |                       |                              |
|                                      | [1] 120/5           | 15.2                     |                    |                           |                       |                              |
|                                      | [2] 121/5           | 14.1                     |                    |                           |                       |                              |
|                                      | [3] 133/7           | 15.3                     |                    |                           |                       |                              |
|                                      | [4] 139/1           | 14.3                     |                    |                           |                       |                              |
| <i>mdl-1(tm311)</i>                  | [C] 500/17          | 12.8                     | -13.1              | <.0001                    |                       |                              |
|                                      | [1] 119/4           | 14.4                     | -5.4               | 0.0288                    |                       |                              |
|                                      | [2] 115/4           | 12.0                     | -15.1              | <.0001                    |                       |                              |
|                                      | [3] 125/8           | 12.9                     | -16.0              | <.0001                    |                       |                              |
|                                      | [4] 141/1           | 12.1                     | -15.5              | <.0001                    |                       |                              |
| <i>daf-2 (m577)</i>                  | [C] 412/57          | 35.2                     | +139.2             | <.0001                    |                       |                              |
|                                      | [1] 87/26           | 31.0                     | +104.4             | <.0001                    |                       |                              |
|                                      | [2] 86/3            | 34.0                     | +141.1             | <.0001                    |                       |                              |
|                                      | [3] 121/8           | 35.1                     | +129.2             | <.0001                    |                       |                              |
|                                      | [4] 118/20          | 39.2                     | +174.1             | <.0001                    |                       |                              |
| <i>daf-2(m577);<br/>mdl-1(tm311)</i> | [C] 438/78          | 26.6                     | +80.9              | <.0001                    | -24.5                 | <.0001                       |
|                                      | [1] 75/59           | 21.2                     | +39.4              | <.0001                    | -31.7                 | <.0001                       |
|                                      | [2] 113/1           | 28.0                     | +98.5              | <.0001                    | -17.6                 | <.0001                       |
|                                      | [3] 132/4           | 27.0                     | +76.4              | <.0001                    | -22.9                 | <.0001                       |
|                                      | [4] 118/14          | 28.3                     | +97.9              | <.0001                    | -27.9                 | <.0001                       |

**Table S2. *glp-4(bn2)* and FUDR do not suppress *mdl-1* shortevity.** Genotypes: N2 wildtype, GA1200 *mdl-1(tm311)*, SS104 *glp-4(bn2)*, GA1230 *glp-4; mdl-1*. p, log rank test. [n] biological replicates number. *glp-4* trial, worms raised at 15°C to L4, then shifted to 25°C.

| Genotype                                                                       | Deaths/<br>censored | Mean life<br>span (days) | % vs. wild type | p vs. wild type | % vs. <i>glp-4</i> | p vs. <i>glp-4</i> |
|--------------------------------------------------------------------------------|---------------------|--------------------------|-----------------|-----------------|--------------------|--------------------|
| <b><i>glp-4</i> Trials</b> (worms raised at 15°C, shifted at L4 stage to 25°C) |                     |                          |                 |                 |                    |                    |
| Wild type                                                                      | [1] 77/11           | 15.5                     |                 |                 |                    |                    |
|                                                                                | [2] 69/11           | 13.2                     |                 |                 |                    |                    |
| <i>mdl-1(tm311)</i>                                                            | [1] 61/11           | 12.9                     | -17.0           | 0.0002          |                    |                    |
|                                                                                | [2] 48/11           | 11.3                     | -14.5           | 0.0023          |                    |                    |
| <i>glp-4(bn2)</i>                                                              | [1] 86/14           | 15.7                     | +1.59           | 0.46            |                    |                    |
|                                                                                | [2] 64/9            | 14.3                     | +8.4            | 0.43            |                    |                    |
| <i>glp-4; mdl-1</i>                                                            | [1] 120/4           | 12.3                     | -4.4            | <0.0001         | -21.6              | <0.0001            |
|                                                                                | [2] 75/6            | 9.1                      | -19.2           | <0.0001         | -36.3              | <0.0001            |
| <b><i>glp-4</i> Trials</b> (worms raised and maintained at 25°C)               |                     |                          |                 |                 |                    |                    |
| Wild type                                                                      | [1] 87/7            | 12.2                     |                 |                 |                    |                    |
|                                                                                | [2] 78/12           | 14.2                     |                 |                 |                    |                    |
| <i>mdl-1(tm311)</i>                                                            | [1] 78/19           | 11.4                     | -6.6            | 0.20            |                    |                    |
|                                                                                | [2] 76/22           | 12.7                     | -10.7           | 0.05            |                    |                    |
| <i>glp-4(bn2)</i>                                                              | [1] 94/9            | 14.0                     | +14.8           | 0.0035          |                    |                    |
|                                                                                | [2] 77/16           | 17.6                     | +24.0           | 0.0002          |                    |                    |
| <i>glp-4; mdl-1</i>                                                            | [1] 83/17           | 12.3                     | +0.8            | 0.21            | -12.0              | 0.024              |
|                                                                                | [2] 70/17           | 15.0                     | -15.2           | 0.36            | -14.7              | 0.0051             |
| <b>FUDR Trials</b>                                                             |                     |                          |                 |                 |                    |                    |
| Wild type                                                                      | [1] 46/14           | 17.5                     |                 |                 |                    |                    |
|                                                                                | [2] 41/19           | 16.8                     |                 |                 |                    |                    |
| <i>mdl-1(tm311)</i>                                                            | [1] 49/11           | 12.4                     | -41.1           | <0.0001         |                    |                    |
|                                                                                | [2] 49/11           | 13.3                     | -26.3           | 0.0027          |                    |                    |
| Wild type<br>(50µM FUDR)                                                       | [1] 55/5            | 17.3                     | -1.2            | 0.55            | -1.2               | 0.55               |
|                                                                                | [2] 57/3            | 14.6                     | -15.1           | 0.022           | -15.1              | 0.022              |
| <i>mdl-1(tm311)</i><br>(50µM FUDR)                                             | [1] 54/6            | 12.7                     | -37.8           | <0.0001         | +2.4               | 0.80               |
|                                                                                | [2] 49/11           | 11.6                     | -44.8           | <0.0001         | -14.7              | 0.032              |

**Table S1. Effect of *mdl-1* on life span in *C. elegans*.**

| Strain                                                           | Deaths/<br>censored                | Mean life<br>span (days)       | % vs. wild<br>type                | <i>p</i> vs. wild<br>type               | % vs. <i>mdl-1</i>                | <i>p</i> vs. <i>mdl-1</i>               |
|------------------------------------------------------------------|------------------------------------|--------------------------------|-----------------------------------|-----------------------------------------|-----------------------------------|-----------------------------------------|
| Wild type                                                        | [C] 198/0<br>[1] 99/0<br>[2] 99/0  | <b>11.30</b><br>11.83<br>10.97 |                                   |                                         |                                   |                                         |
| <i>mdl-1(tm311)</i>                                              | [C] 198/1<br>[1] 99/0<br>[2] 99/1  | <b>9.36</b><br>9.57<br>9.15    | <b>-17.97</b><br>-19.10<br>-15.20 | <b>&lt;0.0001</b><br><0.0001<br><0.0001 |                                   |                                         |
| <i>mdl-1; wuEx267</i><br><i>[mdl-1 rol-6]</i>                    | [C] 191/0<br>[1] 80/0<br>[2] 111/0 | <b>10.91</b><br>11.36<br>10.59 | <b>-3.45</b><br>-3.97<br>-1.85    | <b>0.0060</b><br>0.04<br>0.22           | <b>+19.55</b><br>+18.70<br>+15.74 | <b>&lt;0.0001</b><br><0.0001<br><0.0001 |
| <i>mdl-1; wuEx268</i><br><i>[pges-1::mdl-1</i><br><i>rol-6].</i> | [C] 210/0<br>[1] 94/0<br>[2] 116/0 | <b>9.97</b><br>10.47<br>9.56   | <b>-11.77</b><br>-11.50<br>-11.40 | <b>&lt;0.0001</b><br><0.0001<br><0.0001 | <b>+9.51</b><br>+9.40<br>+4.48    | <b>&lt;0.0001</b><br><0.0001<br>0.0059  |
